# Supplementary material for: Spin and dielectric transitions promoted by dimerization of anionic radical stacks and volume-conserving motion of cations in an ion-pair compound
Source: Royal Society of Chemistry journal article supplement (doi:10.1039/d4dt01719f), 2024-01-01
Supplement: d4dt01719f1.pdf [file d4dt01719f1.pdf]

# Spin and Dielectric Transitions Promoted by Dimerization of Anionic Radical Stack and Volume-conserving Motion of Cations in an Ion-pair Compound

Zi-Heng Feng,<sup>a</sup> Qin-Yu Zhu,<sup>a</sup> Yin Qian,<sup>\*a</sup> Xu-Sheng Gao,<sup>\*a</sup> Xiao-Ming Ren<sup>\*a,b</sup>

<sup>a</sup>State Key Laboratory of Materials-Oriented Chemical Engineering and College of Chemistry and Molecular Engineering, Nanjing Tech University, Nanjing 211816, P. R. China

<sup>b</sup>State Key Laboratory of Coordination Chemistry, Nanjing University, Nanjing 210023, P. R. China

Email:

[yinqian@njtech.edu.cn](mailto:yinqian@njtech.edu.cn) (Y.Q.)

[gaogs@njtech.edu.cn](mailto:gaogs@njtech.edu.cn) (X.S.G.)

[xmren@njtech.edu.cn](mailto:xmren@njtech.edu.cn) (X.M.R.)

## Contents

### Experimental section

#### Reagents and materials

#### Preparation of compounds

#### Physical measurements

#### X-ray Crystallography

Table S1. Crystallographic data and refinement parameters of **1** at 298 and 368 K.

Table S2. Table S2 Selected bond lengths and angles in anion and cation of **1** at 298 and 368 K.

Table S3 H-bonding in LTP and HTP output by Platon program.

Fig. S1: TG plot of **1** in 298–1073 K, and **1** is thermally stable up to ca.541 K, showing extra thermostability.

Fig. S2: DSC plots of **1** in 280–423 K in two sequential heating-cooling cycles.

Fig. S3. Illustration of (a) planar  $[\text{Ni}(\text{mnt})_2]^-$  anion and (b)  $[\text{DPIIm}]^+$  cation with two different configurations of alkyl chains.

Fig. S4. The packing structure along a-axis view of LTP (left) and HTP (right).

Fig. S5. At frequency of 1 MHz, the plots of permittivity in heating and cooling run, exhibit the reversible low- and high- dielectric states of **1**.

Fig. S6. Hirshfeld surface mapped with  $d_{\text{norm}}$ . Neighboring anions associated with close contacts are shown along with distances between the atoms involved for **1** in (a) LTP and (b) HTP.

Fig. S7. The Hirshfeld  $d_{\text{norm}}$  surfaces and the 2D fingerprint plots of close contacts the thiomorpholine cations in LTP of **1**.

Fig. S8. The Hirshfeld  $d_{\text{norm}}$  surfaces and the 2D fingerprint plots of the thiomorpholine cations in HTP of **1**.

## References

## Experimental section

### Reagents and materials

All reagents and materials of analytical grade were obtained from commercial sources and used without additional purification. Disodium maleonitriledithiolate ( $\text{Na}_2\text{mnt}$ ) was synthesized according to published procedures.<sup>1</sup>

### Synthesis of $[\text{DPIIm}][\text{Ni}(\text{mnt})_2]$ (**1**)

A solution containing  $\text{NiCl}_2 \cdot 6\text{H}_2\text{O}$  (0.237 g, 0.01 mol) and  $\text{Na}_2\text{mnt}$  (0.37 g, 0.02 mol) in  $\text{H}_2\text{O}$  was stirred for 2 hours, followed by the addition of  $[\text{DPIIm}]\text{Br}$  (0.451 g, 0.02 mol). The resulting red microcrystals were filtered, washed with  $\text{H}_2\text{O}$ , and subsequently dried under vacuum. The red microcrystals were dissolved in methanol, and to this solution, a solution of **I2** in methanol was added. After stirring for 2 hours, the resulting black microcrystals were harvested by filtration, washed with methanol, and dried under vacuum. Yield: ~62% (Found: C, 41.36; H, 3.55; N, 17.11%. Calc. for  $\text{C}_{14}\text{H}_{11}\text{N}_6\text{NiS}_4$ : C, 41.47; H, 3.48; N, 17.07%). Selected Infrared spectrum bands ( $\text{cm}^{-1}$ ): 2207(vs) is attributed to the  $\nu_{\text{C}\equiv\text{N}}$  of the  $\text{mnt}^{2-}$  ligands; 2977(s) and 3111(w) corresponding to  $\nu_{\text{C-H}}$  in the imidazole rings and both methyl and methylene; 1564(s) is assigned to the skeleton vibration in imidazole rings; 1161(vs) and 1456(s) arise from the  $\nu_{\text{C=S}} + \nu_{\text{C=C}}$  and  $\nu_{\text{C-C}}$  of the  $\text{mnt}^{2-}$  ligands.

### Chemical and Physical Measurement

Elemental analyses for C, H and N were performed with an Elementar Vario EL III analytical instrument. Infrared spectra (IR) were recorded on a Nicolet iS5 spectrometer with KBr pellets in the spectral range of 400–4000  $\text{cm}^{-1}$ . The powder X-ray diffraction (PXRD) patterns were collected using a SHIMADZU XRD-6100 diffractometer with Cu  $\text{K}\alpha$  radiation ( $\lambda = 1.5418 \text{ \AA}$ ), operated at 40 kV and 40 mA. The  $2\theta$  angle ranges from 5 to 50° with a step of 0.01° at ambient condition. Thermogravimetric analysis (TGA) was performed with an SDT Q600 thermogravimetric analyzer in 20–800 °C under nitrogen atmosphere, the polycrystalline sample was placed in a platinum-pan, the heating rate is 20 °C  $\text{min}^{-1}$  and the nitrogen flow rate is 100  $\text{mL min}^{-1}$ . Differential scanning calorimetry (DSC) was carried out for **1** on a Pyris 1 power-compensation differential scanning calorimeter with a warming rate of 10 K  $\text{min}^{-1}$  during the heating

process. Optical graphs were observed with a Leica DMRX polarizing optical microscope equipped with a LINKAM LTS350 cool and hot stage. Magnetic susceptibility data were measured for polycrystalline samples on a Quantum Design MPMS-5 superconducting quantum interference device magnetometer, such a measurement was performed over the temperature range of 1.8–400 K in both cooling and warming modes and in the applied magnetic field of 2000 Oe, and the diamagnetism arising from atomic cores has been removed. Temperature- and frequency-dependent dielectric permittivity and AC impedance measurements were carried out on a Concept 80 system (Novocontrol, Germany) in 273–373 K for **1**, respectively. The powdered disc, with a thickness of ca. 1.585 mm as well as a diameter of 7.0 mm, was coated by gold films on the opposite surfaces and sandwiched by platinum electrodes and the AC frequencies span from 100 to  $10^7$  Hz. The X-ray single crystal crystallography information files of **1** in LTP and HTP were used as the input file. In Crystal Explorer, the electrostatic potential surface map was calculated using the TONTO application with B3LYP/6-311G (d,p)  $\pm 0.03$  a.u. For HTP, the crystal symmetry was reduced to  $P2_1212_1$  to remove the symmetry-disordered cations.

### **X-ray Crystallography**

Single crystal X-ray diffraction (SCXRD) data for **1** were collected at 173 K using Graphite monochromated Mo  $K\alpha$  ( $\lambda = 0.71073$  Å) on a Bruker D8 QUEST Apex III CCD area detector diffractometer. Data reduction and absorption correction were performed with the SAINT<sup>2</sup> and SADABS<sup>3</sup> software packages, respectively. The structures were solved by a direct method using the SHELXL-2018 software package<sup>4</sup>. The non-hydrogen atoms were anisotropically refined using the full-matrix least-squares method on  $F^2$ . All hydrogen atoms were geometrically fixed and placed in the ideal position.

Table S1: Crystallographic data and refinement parameters of **1** at 298 and 368 K

|                                                                                                       |                                                                   |                                                                 |
|-------------------------------------------------------------------------------------------------------|-------------------------------------------------------------------|-----------------------------------------------------------------|
| Chemical formula                                                                                      | C <sub>17</sub> H <sub>17</sub> N <sub>6</sub> NiS <sub>4</sub>   | C <sub>17</sub> H <sub>17</sub> N <sub>6</sub> NiS <sub>4</sub> |
| Temperature / K                                                                                       | 298                                                               | 368                                                             |
| CCDC number                                                                                           | 2076780                                                           | 2076781                                                         |
| Formula weight                                                                                        | 492.32                                                            | 492.32                                                          |
| Crystal system                                                                                        | Monoclinic                                                        | Orthorhombic                                                    |
| Wavelength/Å                                                                                          | 0.71073                                                           | 0.71073                                                         |
| Space group                                                                                           | <i>P</i> 2 <sub>1</sub> / <i>n</i>                                | <i>Pnma</i>                                                     |
| <i>a</i> / Å                                                                                          | 7.1823(4)                                                         | 20.09(7)                                                        |
| <i>b</i> / Å                                                                                          | 20.787(14)                                                        | 7.18(2)                                                         |
| <i>c</i> / Å                                                                                          | 15.2194(10)                                                       | 16.16(5)                                                        |
| $\alpha$ / °                                                                                          | 90                                                                | 90                                                              |
| $\beta$ / °                                                                                           | 96.373(3)                                                         | 90                                                              |
| $\gamma$ / °                                                                                          | 90                                                                | 90                                                              |
| <i>V</i> (Å <sup>3</sup> ) / <i>Z</i>                                                                 | 2258.2(2) / 4                                                     | 2331(13) / 4                                                    |
| $\rho$ / g cm <sup>-3</sup>                                                                           | 1.448                                                             | 1.403                                                           |
| <i>F</i> (000)                                                                                        | 1012                                                              | 1012                                                            |
| $\theta$ Ranges                                                                                       | 2.38–27.54                                                        | 2.38–14.997                                                     |
| Index range                                                                                           | –9 ≤ <i>h</i> ≤ 9,<br>–22 ≤ <i>k</i> ≤ 26,<br>–19 ≤ <i>l</i> ≤ 16 | 0 ≤ <i>h</i> ≤ 14,<br>0 ≤ <i>k</i> ≤ 5,<br>0 ≤ <i>l</i> ≤ 11    |
| Goodness-of-fit on <i>F</i> <sup>2</sup>                                                              | 0.915                                                             | 1.086                                                           |
| <sup>a</sup> <i>R</i> <sub>1</sub> , <sup>b</sup> <i>wR</i> <sub>2</sub> [ <i>I</i> > 2σ( <i>I</i> )] | 0.0584, 0.1286                                                    | 0.0889, 0.2217                                                  |
| <i>R</i> <sub>1</sub> , <i>wR</i> <sub>2</sub> [all data]                                             | 0.1709, 0.1754                                                    | 0.1341, 0.2692                                                  |

$$^a R_1 = \sum ||F_o| - |F_c| / \sum |F_o|; ^b wR_2 = \{ \sum [w(F_o^2 - F_c^2)^2] / \sum [w(F_o^2)^2] \}^{1/2}$$

Table S2 Selected bond lengths and angles in anion and cation of **1** at 298 and 368 K

| Bond lengths /Å |            |                 |           |
|-----------------|------------|-----------------|-----------|
| T = 298 K       |            | T = 368 K       |           |
| Ni(1)-S(1)      | 2.1462(13) | Ni(1)-S(1)      | 2.135(13) |
| Ni(1)-S(2)      | 2.1455(13) | Ni(1)-S(2)      | 2.128(13) |
| Ni(1)-S(3)      | 2.1413(13) | Ni(1)-S(3)      | 2.121(13) |
| Ni(1)-S(4)      | 2.1421(12) | Ni(1)-S(4)      | 2.132(12) |
| S(1)-C(1)       | 1.714(5)   | S(1)-C(1)       | 1.66(6)   |
| S(2)-C(2)       | 1.705(5)   | S(2)-C(2)       | 1.75(7)   |
| S(3)-C(5)       | 1.700(4)   | S(3)-C(5)       | 1.70(6)   |
| S(4)-C(6)       | 1.703(4)   | S(4)-C(6)       | 1.71(6)   |
| N(2)-C(4)       | 1.141(6)   | N(2)-C(4)       | 1.24(5)   |
| C(2)-C(1)       | 1.370(6)   | C(2)-C(1)       | 1.16(8)   |
| C(2)-C(4)       | 1.431(7)   | C(2)-C(4)       | 1.33(6)   |
| C(7)-N(3)       | 1.144(6)   | C(7)-N(3)       | 1.20(5)   |
| C(7)-C(5)       | 1.428(6)   | C(7)-C(5)       | 1.28(5)   |
| N(4)-C(8)       | 1.141(6)   | N(4)-C(8)       | 1.21(6)   |
| C(5)-C(6)       | 1.363(6)   | C(5)-C(6)       | 1.18(6)   |
| C(1)-C(3)       | 1.429(6)   | C(1)-C(3)       | 1.34(8)   |
| C(8)-C(6)       | 1.436(6)   | C(8)-C(6)       | 1.32(6)   |
| C(3)-N(1)       | 1.142(6)   | C(3)-N(1)       | 1.14(6)   |
| N(5)-C(9)       | 1.322(6)   | N(5)-C(9)       | 1.389(6)  |
| N(5)-C(11)      | 1.343(6)   | N(5)-C(15)      | 1.40(2)   |
| N(5)-C(15)      | 1.473(7)   | N(5)-C(11)      | 1.389(6)  |
| N(6)-C(9)       | 1.288(6)   | N(5)-C(10)      | 1.97(3)   |
| N(6)-C(10)      | 1.354(6)   | C(9)-N(6)       | 1.414(6)  |
| N(6)-C(12)      | 1.474(7)   | N(6)-C(10)      | 1.337(6)  |
| C(11)-C(10)     | 1.329(7)   | N(6)-C(12)      | 1.39(2)   |
| C(12)-C(13)     | 1.366(8)   | C(10)-C(11)     | 1.389(6)  |
| C(14)-C(13)     | 1.504(8)   | C(12)-C(13)     | 1.512(16) |
| C(17)-C(16)     | 1.406(8)   | C(13)-C(14)     | 1.512(16) |
| C(15)-C(16)     | 1.397(13)  | C(15)-C(16)     | 1.508(17) |
|                 |            | C(16)-C(17)     | 1.509(16) |
| Bond angles/°   |            |                 |           |
| T = 298 K       |            | T = 368 K       |           |
| S(4)-Ni(1)-S(3) | 92.3 (5)   | S(4)-Ni(1)-S(3) | 91.8(5)   |
| S(4)-Ni(1)-S(1) | 176.8 (7)  | S(4)-Ni(1)-S(1) | 179.3(5)  |
| S(3)-Ni(1)-S(1) | 88.1 (5)   | S(3)-Ni(1)-S(1) | 87.5(5)   |
| S(4)-Ni(1)-S(2) | 178.2 (5)  | S(4)-Ni(1)-S(2) | 88.5(5)   |
| S(3)-Ni(1)-S(2) | 86.8 (7)   | S(4)-Ni(1)-S(1) | 179.3(5)  |
| S(1)-Ni(1)-S(2) | 92.7 (5)   | S(1)-Ni(1)-S(2) | 92.3(5)   |
| C(5)-S(3)-Ni(1) | 103.4 (16) | C(5)-S(3)-Ni(1) | 100(3)    |
| C(1)-S(1)-Ni(1) | 103.0 (17) | C(6)-S(4)-Ni(1) | 101(3)    |

|                   |            |                   |           |
|-------------------|------------|-------------------|-----------|
| C(6)-S(4)-Ni(1)   | 103.3 (16) | C(2)-S(2)-Ni(1)   | 96(3)     |
| C(2)-S(2)-Ni(1)   | 103.2 (17) | C(1)-S(1)-Ni(1)   | 103(3)    |
| C(1)-C(2)-C(4)    | 121.4(4)   | C(6)-C(5)-C(7)    | 122(8)    |
| C(1)-C(2)-S(2)    | 120.7(4)   | C(6)-C(5)-S(3)    | 125(8)    |
| C(4)-C(2)-S(2)    | 117.9(4)   | C(7)-C(5)-S(3)    | 113(6)    |
| N(3)-C(7)-C(5)    | 179.0(5)   | C(5)-C(6)-S(4)    | 121(8)    |
| C(6)-C(5)-C(7)    | 121.2(4)   | C(5)-C(6)-C(8)    | 122(8)    |
| C(6)-C(5)-S(3)    | 120.5(4)   | S(4)-C(6)-C(8)    | 116(5)    |
| C(7)-C(5)-S(3)    | 118.2(3)   | N(4)-C(8)-C(6)    | 179(6)    |
| C(2)-C(1)-C(3)    | 121.2(4)   | N(3)-C(7)-C(5)    | 179(6)    |
| C(2)-C(1)-S(1)    | 120.3(4)   | C(1)-C(2)-C(4)    | 128(9)    |
| C(3)-C(1)-S(1)    | 118.5(4)   | C(1)-C(2)-S(2)    | 130(9)    |
| N(2)-C(4)-C(2)    | 178.9(5)   | C(4)-C(2)-S(2)    | 103(6)    |
| N(4)-C(8)-C(6)    | 178.3(5)   | N(2)-C(4)-C(2)    | 166(6)    |
| C(5)-C(6)-C(8)    | 120.1(4)   | C(2)-C(1)-C(3)    | 124(8)    |
| C(5)-C(6)-S(4)    | 120.5(3)   | C(2)-C(1)-S(1)    | 119(9)    |
| C(8)-C(6)-S(4)    | 119.5(3)   | C(3)-C(1)-S(1)    | 117(6)    |
| N(1)-C(3)-C(1)    | 179.3(6)   | N(1)-C(3)-C(1)    | 175(8)    |
| C(9)-N(5)-C(10)   | 109.7(7)   | C(9)-N(5)-C(11)   | 108.0     |
| C(9)-N(5)-C(12)   | 124.1(8)   | C(9)-N(5)-C(15)   | 126.1(11) |
| C(10)-N(5)-C(12)  | 126.2(8)   | C(11)-N(5)-C(15)  | 125.8(10) |
| C(9)-N(6)-C(11)   | 107.9(5)   | N(5)-C(9)-N(6)    | 106.1     |
| C(9)-N(5)-C(15)   | 125.2(6)   | C(10)-N(6)-C(9)   | 109.5     |
| C(11)-N(5)-C(15)  | 126.9(6)   | C(10)-N(6)-C(12)  | 128.2(10) |
| C(10)-C(11)-N(6)  | 106.5(8)   | C(12)-N(6)-C(9)   | 122.2(11) |
| N(6)-C(9)-N(5)    | 107.3(7)   | N(6)-C(10)-C(11)  | 108.4     |
| C(11)-C(10)-N(6)  | 107.2(8)   | C(10)-C(11)-N(5)  | 108.0     |
| C(13)-C(12)-N(6)  | 117.0(6)   | N(6)-C(12)-C(13)  | 120(3)    |
| C(14)-C(13)-C(12) | 117.4(7)   | C(14)-C(13)-C(12) | 108(2)    |
| C(16)-C(15)-N(5)  | 114.8(5)   | N(5)-C(15)-C(16)  | 118(4)    |
| C(15)-C(16)-C(17) | 116.6(7)   | C(15)-C(16)-C(17) | 108(2)    |

Table S3 H-bonding in LTP and HTP output by Platon program

|                    | LTP        | HTP          |
|--------------------|------------|--------------|
| Donor-H...Acceptor | C9-H9...N2 | C11-H11...N3 |
| D-H distance       | 0.93 Å     | 0.93 Å       |
| H...A distance     | 2.61(4) Å  | 2.53(5) Å    |

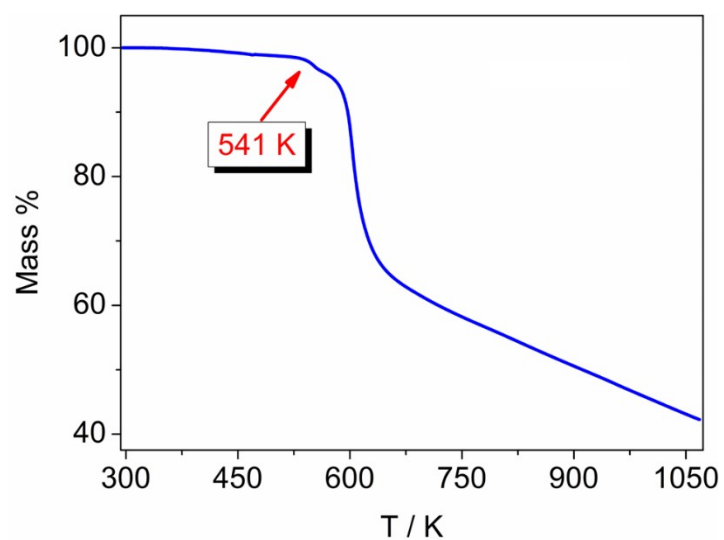

Fig. S1. TG plot of **1** in 298–1073 K, and **1** is thermally stable up to ca.541 K, showing extra thermostability.

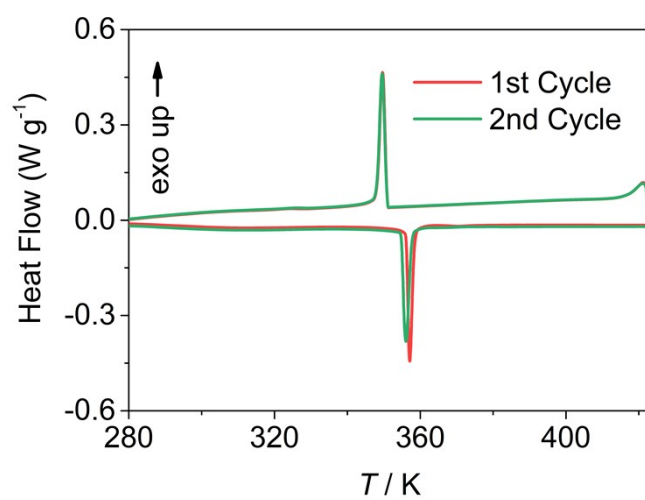

Fig. S2. DSC plots of **1** in 280–423 K in two sequential heating-cooling cycles.

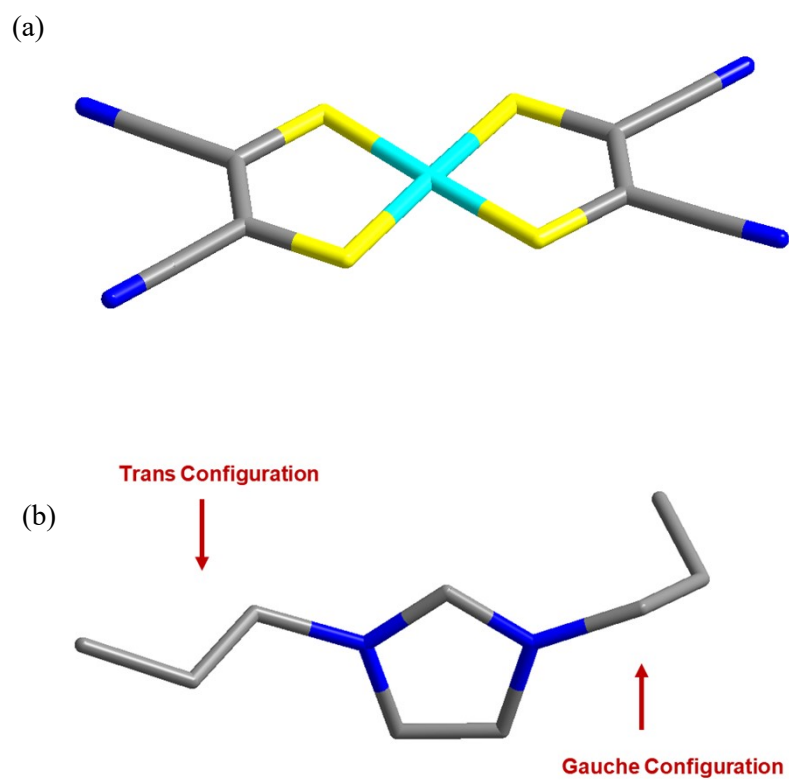

Fig. S3. Illustration of (a) planar  $[\text{Ni}(\text{mnt})_2]^-$  anion and (b)  $[\text{DPIIm}]^+$  cation with different two configurations of alkyl chains.

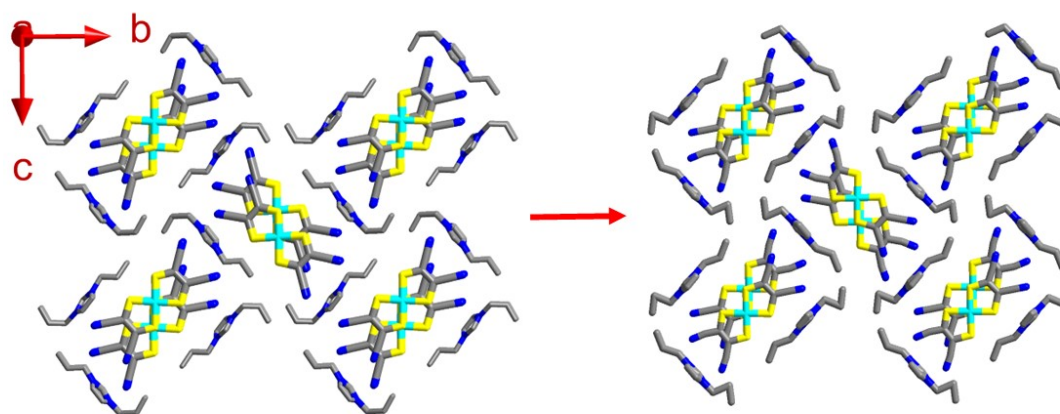

Fig. S4. The packing structure along a-axis view of LTP (left) and HTP (right).

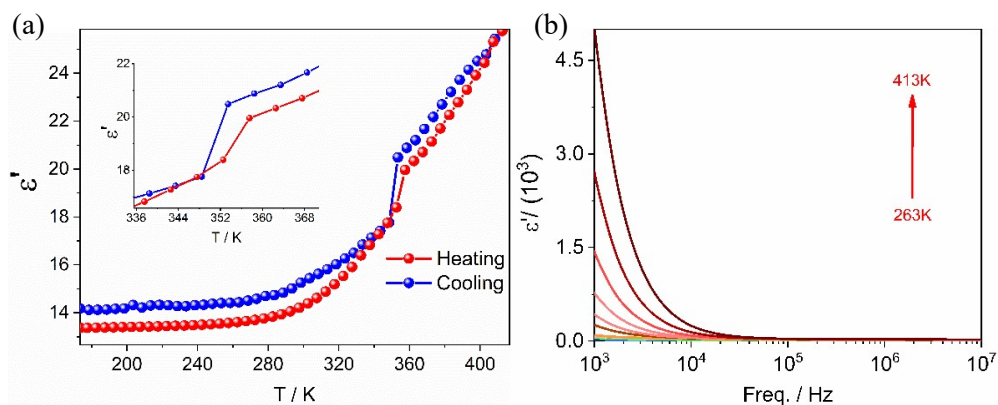

Fig. S5. (a) Plots of dielectric permittivity at frequency of 1 MHz in heating and cooling run, which exhibit the reversible low- and high-dielectric states of **1**. (b) Frequency dependent dielectric permittivity of **1** at the selected temperatures.

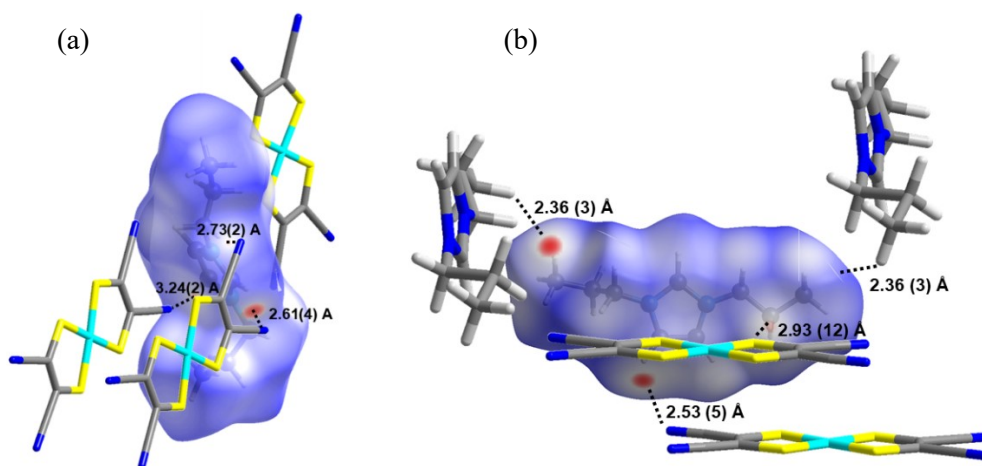

Fig. S6. Hirshfeld surface mapped with  $d_{\text{norm}}$ . Neighboring anions associated with close contacts are shown along with distances between the atoms involved for **1** in (a) LTP and (b) HTP.

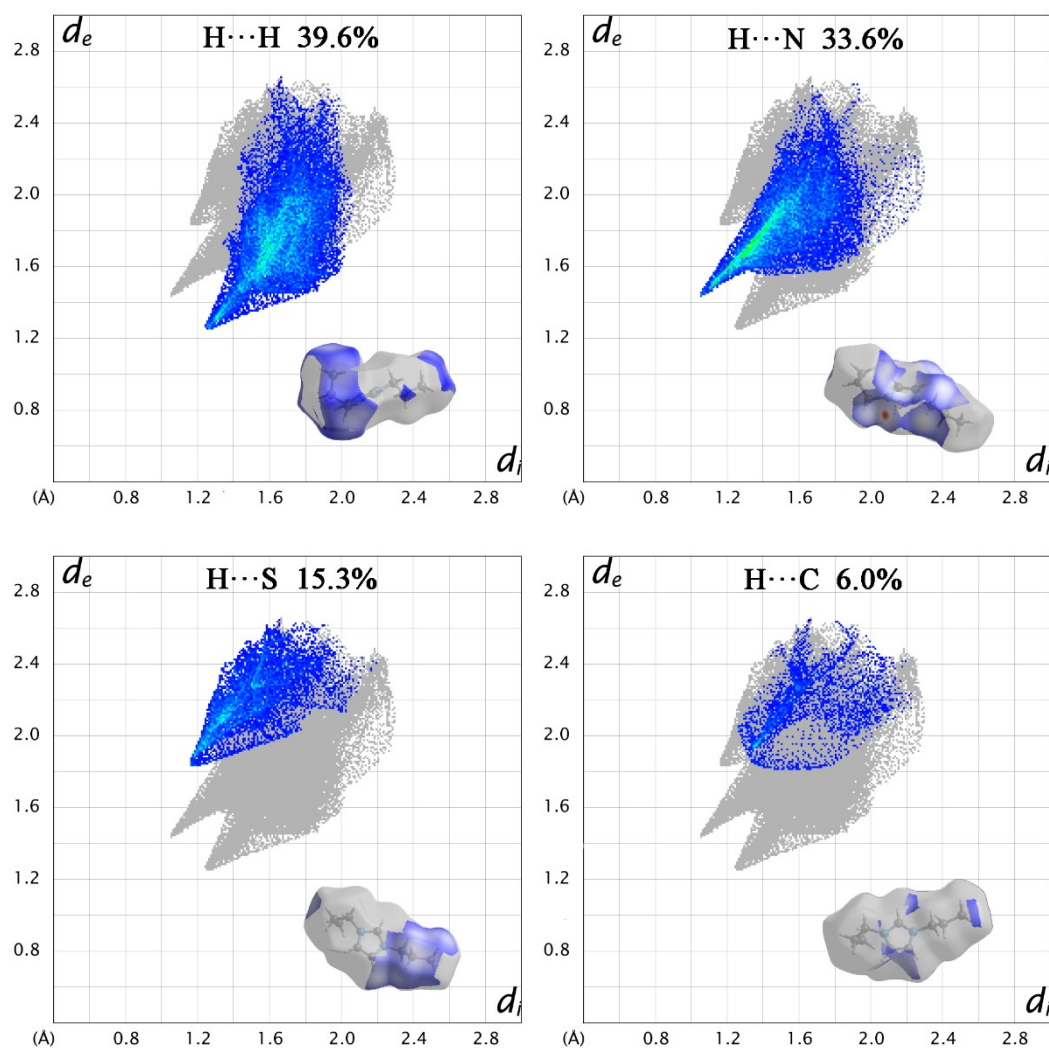

Fig. S7. The Hirshfeld  $d_{\text{norm}}$  surfaces and the 2D fingerprint plots of close contacts the thiomorpholine cations in LTP of **1**.

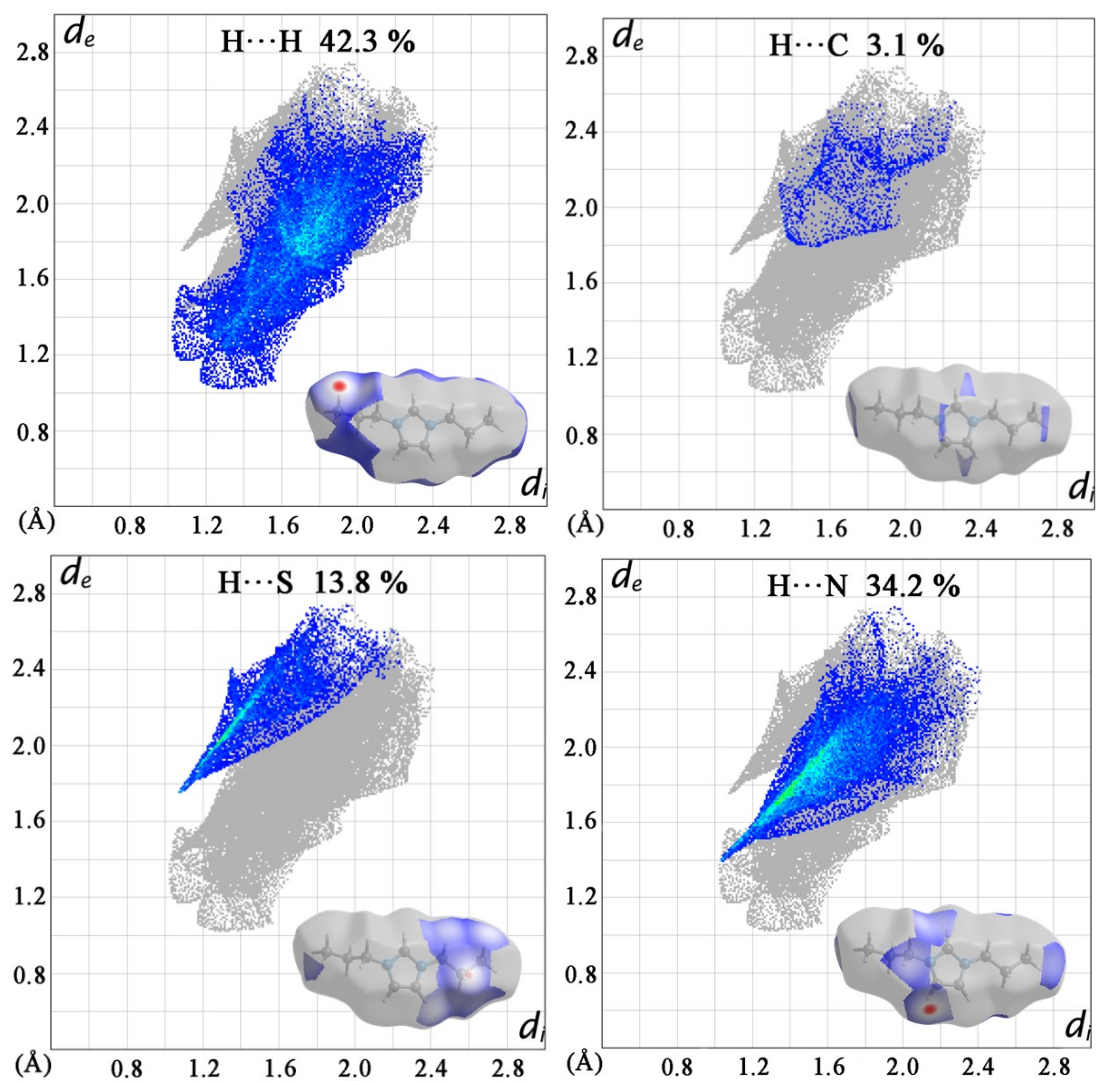

Fig. S8. The Hirshfeld  $d_{\text{norm}}$  surfaces and the 2D fingerprint plots of the thiomorpholine cations in HTP of **1**.

## References

1. A. Davidson, H. R. Holm, *Inorg. Synth.* **1967**, *10*, 8–26.
2. Bruker. *APEX 2, SAINT, XPREP*; Bruker AXS Inc.: Madison, Wisconsin, USA, 2007.
3. Bruker. *SADABS*; Bruker AXS Inc.: Madison, Wisconsin, USA, 2001.
4. G. M. Sheldrick, *SHELXS-2014*, Program for the Solution and Refinement of Crystal Structures; University of Göttingen: Göttingen, Germany, 2014.
